# Supplementary material for: A Human and Rhesus Macaque Interferon-Stimulated Gene Screen Shows That Over-Expression of ARHGEF3/XPLN Inhibits Replication of Hepatitis C Virus and Other Flavivirids
Source: Viruses. 2022 Jul 28;14(8):1655. doi: 10.3390/v14081655 (PMC9414520; doi:10.3390/v14081655)
Supplement: Supplementary file 1 [file viruses-14-01655-s001.zip › viruses-1746166-supplementary.xlsx]

## Sheet: Human ISG screen
Gene Name	RLU (raw)	RLU (raw, randomised negatives)
IFIH1 / MDA5	0.001	0.035
NOD2	0.001	0.04
C5orf39	0.001	0.05
NOS2A	0.001	0.05
MICB	0.001	0.065
APOBEC3A	0.001	0.085
IRF1	0.001	0.085
FAM46C	0.001	0.095
DDX60 (Duplicate)	0.001	0.1
CDKN1A	0.001	0.125
APOBEC3G	0.001	0.13
FLJ11286 aka C19orf66	0.001	0.14
IRF7	0.001	0.155
TRIM38	0.001	0.17
ARHGEF3	0.001	0.195
GEM	0.001	0.21
PARP10	0.001	0.225
ADAR	0.001	0.25
VIPERIN/RSAD2	0.001	0.25
FAM125B	0.257618	0.257618
RNASE4	0.001	0.27
PCTK3	0.001	0.32
DDX58	0.001	0.325
RIPK2	0.001	0.325
APOL3	0.347121	0.347121
TBX3	0.001	0.36
TNFRSF10A	0.001	0.375
PRKD2	0.001	0.385
BATF2	0.001	0.4
N4BP1	0.001	0.4
N/A	0.001	0.435
ISG15	0.001	0.49
ZC3HAV1	0.803003	0.803003
SLC15A3	1.08967	1.08967
IRF2	1.23282	1.23282
ARHGAP17 (NOT ACSL1)	2.39604	2.39604
RIPK2	2.85968	2.85968
OASL	3.33702	3.33702
AGPAT9 actually is water	3.38019	3.38019
CD163	4.00552	4.00552
CD274	4.02347	4.02347
ZNF385B	4.19118	4.19118
VEGFC (alias: VRP)	4.47404	4.47404
TRIM34	4.53992	4.53992
TRIM56	5.12088	5.12088
B2M	5.3098	5.3098
IFITM1(alias: IFI17)	5.34533	5.34533
GBP4	5.69742	5.69742
SAMD9L	6.18016	6.18016
MASTL	6.37171	6.37171
OAS2	7.51289	7.51289
SCARB2	8.04496	8.04496
MAP3K5	8.15164	8.15164
MARCK (alias: MACS)	8.36974	8.36974
ISG20	9.17031	9.17031
SAT1	9.86189	9.86189
FLJ39739	11.1803	11.1803
LAMP3	11.4731	11.4731
MAB21L2	12.1063	12.1063
PMM2	12.1361	12.1361
TRIM21	12.1976	12.1976
CXCL10 alias SCYB10	13.0848	13.0848
EPAS1	13.2929	13.2929
MCL1	14.205	14.205
BCL3	14.9321	14.9321
LGMN	15.0326	15.0326
NPAS2	15.2209	15.2209
ABTB2	16.236	16.236
HLA-F	16.3311	16.3311
STAT3	17.2794	17.2794
SECTM1	17.6207	17.6207
TAP2	18.0171	18.0171
LAMP3 (Duplicate)	18.1653	18.1653
MT1L	18.2147	18.2147
MOV10	18.2358	18.2358
LINCR	18.2977	18.2977
KIAA1618	18.3123	18.3123
IFI35	18.4366	18.4366
C9ofr19/GLIPR2	18.4579	18.4579
GBP5	18.7664	18.7664
UNC93B1	20.1888	20.1888
CX3CL1	20.9065	20.9065
CNP	20.9876	20.9876
LMO2	21.0383	21.0383
PHF15	22.1964	22.1964
CD80	22.2325	22.2325
AKT3	22.3559	22.3559
MT1M	22.6293	22.6293
CASP1	23.092	23.092
DDX3X (alias: DDX3)	23.3555	23.3555
SERPING1 (alias: C1NH)	23.5378	23.5378
CEBPD	24.0276	24.0276
ATF3	24.2216	24.2216
LY6E	24.6332	24.6332
NCOA3	24.6823	24.6823
C9orf91	25.1367	25.1367
PABPC4	25.8311	25.8311
PAK3	26.2355	26.2355
PBEF1 aka NAMPT	26.2698	26.2698
EHD4	26.5495	26.5495
C4orf33	27.5916	27.5916
TRIM25	28.5263	28.5263
TNK2	28.6503	28.6503
IL6ST	28.8855	28.8855
DDIT4	29.1414	29.1414
SMAD3	29.5188	29.5188
FAM46A	29.8845	29.8845
SLFN12	30.0529	30.0529
CD74	30.2568	30.2568
CD9	30.4677	30.4677
NRN1	30.5399	30.5399
HEG1	31.3057	31.3057
CCL5(SYCA5)	31.5875	31.5875
AXUD1	32.1844	32.1844
SP110 (alias: IFI41)	32.6335	32.6335
ALDH1A1	33.0058	33.0058
PML	33.0957	33.0957
AQP9	33.1271	33.1271
LAP3	33.2512	33.2512
SOCS2	33.4989	33.4989
CREB3L3	33.5796	33.5796
GMPR	34.6923	34.6923
PNPT1	34.79	34.79
HSPA6	34.7912	34.7912
TLR3	34.8691	34.8691
GPX2	35.2459	35.2459
KIAA0082 (Duplicate)	35.4139	35.4139
APOL6	35.6915	35.6915
FKBP5	35.7372	35.7372
KIAA0040	36.0507	36.0507
ODC1	36.3178	36.3178
HLA-E	36.9839	36.9839
LGALS9	37.1357	37.1357
ABLIM3	37.2195	37.2195
RBM25	37.542	37.542
KIAA0082	37.588	37.588
RNF24	38.8699	38.8699
RASGEF1B	39.3815	39.3815
GLRX	40.0041	40.0041
ELF1	40.2364	40.2364
IFIT2	40.5687	40.5687
CFB	40.7074	40.7074
TNFSF10	41.0963	41.0963
DDX60	41.622	41.622
SERPINE1 (alias: PAI 1)	41.9547	41.9547
IL15	42.2255	42.2255
FLT1	43.3406	43.3406
CCR1 (alias: CMKBR1)	43.9095	43.9095
MS4A4A	44.004	44.004
CCDC75	44.086	44.086
TRIM5	44.4013	44.4013
IFITM2	44.9448	44.9448
HES4	44.9612	44.9612
PXK	45.5437	45.5437
CSDA	45.828	45.828
IL15RA	46.0697	46.0697
MAFF	46.1342	46.1342
PPM1K	46.7219	46.7219
GBP2	47.6002	47.6002
TMEM51	47.6929	47.6929
FNDC4	48.7926	48.7926
GZMB	48.8083	48.8083
CCND3	50.1167	50.1167
TRIM14	50.2926	50.2926
LIPA	50.4165	50.4165
CLEC4D	50.5746	50.5746
WHDC1	50.6081	50.6081
HERC5	51.8627	51.8627
PDK1	53.9179	53.9179
IFIT3 AKA CIG49	54.9435	54.9435
SCO2	55.1544	55.1544
C10orf10	56.3575	56.3575
CEACAM1	56.7985	56.7985
PTMA	56.9643	56.9643
HCP5	57.8012	57.8012
CPT1A	58.0136	58.0136
CHMP5	58.477	58.477
MAFF	58.5408	58.5408
C2orf31	58.7756	58.7756
WARS	59.0432	59.0432
CXCL9 (alias: MIG)	59.2224	59.2224
SIGLEC1 (FRAG)	59.4677	59.4677
GCA	59.6528	59.6528
FCGR1A	59.8494	59.8494
CD69	60.0931	60.0931
SLC25A30	60.4294	60.4294
PADI2	60.5021	60.5021
MCOLN	60.9835	60.9835
RPL22	61.0819	61.0819
PARP12	61.3148	61.3148
FAM70A	62.0241	62.0241
TLK2	62.5655	62.5655
SERPINB9	63.0433	63.0433
LEPR	63.1711	63.1711
RGL-1	63.4578	63.4578
USP18	63.475	63.475
EMPTY-B1	64.8533	64.8533
SQLE	65.3565	65.3565
BST2/THN	66.5996	66.5996
NCF1	67.2305	67.2305
PLSCR1	67.9297	67.9297
NT5C3	68.398	68.398
BUB1	68.8655	68.8655
ABCA9	69.0694	69.0694
IRF9	69.1152	69.1152
ZNF107	69.6626	69.6626
FLJ23556	70.4455	70.4455
MTHFD2L	70.4995	70.4995
RARRES3	71.0182	71.0182
IL17RB	71.2595	71.2595
EMPTY-H12	72.5794	72.5794
ZNF313 AKA RNF114	73.3919	73.3919
DUSP5	73.9763	73.9763
PSMB8	74.0027	74.0027
MAP3K14	74.1102	74.1102
C4orf32	74.3076	74.3076
FAM134B	74.3243	74.3243
PFKFB3	74.4528	74.4528
THBD	75.1287	75.1287
IFI27	75.2128	75.2128
IFI44	76.3369	76.3369
HERC6	76.7043	76.7043
ENPP1 (alia: PDNP1)	77.0891	77.0891
EXT1	78.1233	78.1233
PRAME	79.6906	79.6906
IFITM3	80.2219	80.2219
TCF7L2	81.647	81.647
RGS1	82.9739	82.9739
CES1	83.3247	83.3247
SNN	84.2922	84.2922
TXNIP	84.4146	84.4146
PLEKHA4	84.7266	84.7266
BIRC3	85.0571	85.0571
PFKFB3 (duplicate)	86.7124	86.7124
PPM1K (Formerly 329)(Duplicate)	87.0882	87.0882
THOC4	88.7841	88.7841
IFI30	89.3493	89.3493
CRY1	89.5426	89.5426
MT1G	89.7233	89.7233
MAFF	89.8529	89.8529
CYP1B1	92.1867	92.1867
HLA-G	92.8677	92.8677
OAS3	93.9378	93.9378
PDGFRL	94.4724	94.4724
CASP7	95.2132	95.2132
MX1	96.0625	96.0625
CCL19	96.4648	96.4648
IMPA2	96.7724	96.7724
CCNA1	96.9684	96.9684
GTPBP2	97.5445	97.5445
BTN3A3	98.571	98.571
TNFAIP3	99.8315	99.8315
ANKFY1	100.267	100.267
CLEC4A	100.334	100.334
TAP1 (alias: ABCB2)	100.482	100.482
RBCK1	100.489	100.489
TYMP	100.708	100.708
STAP1	100.919	100.919
IL28RA AKA CRF2	101.599	101.599
JUNB	101.966	101.966
SAA1	103.543	103.543
TMEM49	103.953	103.953
STAT2	104.549	104.549
GBP3	105.053	105.053
MYD88	105.484	105.484
DYNLT1	105.56	105.56
SLC25A28	105.65	105.65
G6PC	106.179	106.179
DTX3L	106.219	106.219
DCP1A	106.318	106.318
SOCS1	106.575	106.575
CTCFL	107.515	107.515
FUT4	108.441	108.441
HSH2D	111.022	111.022
EMPTY-B1	112.648	112.648
CCDC92	112.85	112.85
PMAIP1	115.319	115.319
HESX1	115.54	115.54
COMMD3	117.179	117.179
ARNTL	118.539	118.539
RBM43	121.018	121.018
S100A8	121.915	121.915
CCL8	122.239	122.239
IL1R	122.584	122.584
GCH1	124.469	124.469
ZBP1	125.59	125.59
RASSF4	125.67	125.67
AIM2	125.851	125.851
BLVRA	126.554	126.554
CCL4	126.658	126.658
IRF2 aka PRIC285	127.308	127.308
STAT1	128.63	128.63
MKX	128.954	128.954
RNF19B	129.099	129.099
UBA7	129.991	129.991
IGFBP2	130.09	130.09
EIF3EIP	131.049	131.049
RAB27A	131.551	131.551
UPP2	132.154	132.154
ADM	132.505	132.505
CCL2(alias: SCYA2, MCP1)	133.1	133.1
NAPA	133.14	133.14
BLZF1	133.819	133.819
ANGPTL1	134.047	134.047
FBXO6	135.09	135.09
INDO (alias: IDO)	135.936	135.936
B4GALT5	136.547	136.547
IFI16	137.306	137.306
BCL2L14	138.642	138.642
SSBP3	139.139	139.139
EMPTY-B1	139.502	139.502
OGFR	140.001	140.001
GJA4	141.323	141.323
DEFB1	141.831	141.831
ERLIN1	142.064	142.064
N/A	142.518	142.518
ARG2	143.514	143.514
FER1L3 AKA MYOF	143.862	143.862
EMPTY-B1	144.896	144.896
MAX	145.918	145.918
SLC16A1	146.219	146.219
GAK	146.674	146.674
BAG1	146.767	146.767
CD38	146.97	146.97
LRG1	147.596	147.596
DHX58	148.424	148.424
NMI	149.524	149.524
CMAH	151.075	151.075
RTP4	154.344	154.344
XAF1	154.45	154.45
TNFAIP6	156.019	156.019
SAMD4A	160.024	160.024
TAGAP	160.802	160.802
VAMP5	161.525	161.525
HK2	162.053	162.053
PCTK2	164.364	164.364
EMPTY-B1	165.941	165.941
LGALS3	166.434	166.434
TIMP1	166.924	166.924
GK	169.109	169.109
C15orf48	170.21	170.21
STEAP4	172.933	172.933
FNDC3B	173.691	173.691
AHNAK2	174.303	174.303
TNFSF13B	174.997	174.997
NFIL3	175.924	175.924
CLEC2B	176.043	176.043
PUS1	180.842	180.842
C22orf28	181.185	181.185
EPSTI1	181.36	181.36
FFAR2	185.673	185.673
TDRD7/PCTAIRE2BP	185.924	185.924
TREX1	188.931	188.931
NUP50	189.041	189.041
ATP10D	190.493	190.493
IFIT5	190.804	190.804
P2RY6	192.382	192.382
SLFN5	199.865	199.865
CXCL11	201.399	201.399
IL1RN	203.897	203.897
IFNGR1	205.831	205.831
PSMB9	206.849	206.849
STARD5	207.155	207.155
OAS1	211.206	211.206
MAFB	211.392	211.392
EIF2AK2	211.956	211.956
APOL2	212.108	212.108
C1S	214.404	214.404
C5orf27	214.406	214.406
TLR7	214.657	214.657
SIRPA	217.84	217.84
TRAFD1	221.329	221.329
PIM3	221.746	221.746
XRN	224.712	224.712
ADFP	228.473	228.473
ETV7	228.543	228.543
MT1H	231.387	231.387
IFI6	235.398	235.398
EMPTY-H12	237.481	237.481
IFIT1 (alias: IFI56, ISG56)	246.001	246.001
APOL1	247.593	247.593
UBE2L6	249.334	249.334
TGFB1	250.502	250.502
MX2	252.105	252.105
GBP1	253.786	253.786
EMPTY-H12	256.865	256.865
ANKRD22	257.709	257.709
IFI44L	258.912	258.912
SAMHD1	259.383	259.383
C6orf150	260.38	260.38
CCDC109B	264.167	264.167
ADAMDEC1	265.456	265.456
DNAPTP6(LOC26010)	266.154	266.154
UNC84B	267.952	267.952
EMPTY-H12	268.629	268.629
ZNF107	270.174	270.174
SLC1A1	278.924	278.924
HLA-C	284.749	284.749
PNRC1	289.907	289.907
PPM1K	293.707	293.707
PI4K2B	309.522	309.522
ULK4	319.395	319.395
OPTN	332.844	332.844
SPTLC2	335.703	335.703
CRP	348.87	348.87
PSCD1 AKA CYTH1	354.186	354.186
ETV6	373.142	373.142
MT1F	390.089	390.089
NDC80	418.339	418.339
SP100	442.065	442.065
LOC400759/PSEUDOGENE	457.777	457.777
ZNF295	466.715	466.715
GALNT2	471.766	471.766
TFEC	495.299	495.299
MSR1	518.656	518.656
AMPH	531.597	531.597
SPSB1	606.932	606.932
HPSE	627.555	627.555
Water	0.001
Water	0.001
Water	0.001
Water	0.001
Water	0.001

## Sheet: Macaque ISG screen
Gene Name	RLU (raw)	RLU (raw, randomised negatives)
USP18	0	0.025
IL6ST	0.0001	0.035
CCDC92	0.0001	0.045
TRAFD1	0.0001	0.045
CASP1	0.0001	0.06
TNFRSF10A	0.0001	0.065
BTN3A1	0	0.07
NCOA7	0.0001	0.1
RNASE4	0.0001	0.135
HRASLS2	0	0.16
SCARB2	0.0001	0.195
IFNB1	0.0001	0.205
EIF2AK2	0.0001	0.22
APOBEC3F	0	0.23
MAFF	0.0001	0.24
RGS1	0.0001	0.365
ANKFY1	0.0001	0.4
BST2/THN	0.0001	0.42
MLKL	0.0001	0.46
FLJ31033 DDX60L	0	0.5
IRF7	0.615839	0.615839
RNF24 (Fragment)	0.70104	0.70104
BTN3A1	1.44768	1.44768
GEM	2.18848	2.18848
FOXN2	2.39405	2.39405
GBP1	2.40071	2.40071
HLA-X	2.77581	2.77581
XRN	3.32599	3.32599
PTAR1	3.91744	3.91744
AKT3	4.28401	4.28401
NCOA7	4.35459	4.35459
IRF1 isoform3	4.67694	4.67694
PLEKHA4	4.83894	4.83894
MASTL	4.89096	4.89096
C5orf39	4.93363	4.93363
VEGFC (alias: VRP)	5.73601	5.73601
IRF7	6.11131	6.11131
NEXN	7.44944	7.44944
PHF11	7.56819	7.56819
GPR37	8.38772	8.38772
PSME2	8.85317	8.85317
PTAR1	9.05546	9.05546
RXFP1	9.43699	9.43699
BCL2L14	9.46251	9.46251
COMMD3	9.70012	9.70012
IMPA2	9.81088	9.81088
TMEM173	10.0054	10.0054
PSMB8	10.0817	10.0817
MICB	10.0896	10.0896
PARP9	10.0963	10.0963
IL20RB	10.4793	10.4793
IFI16	10.7953	10.7953
C1S	10.9177	10.9177
PIM3	11.0134	11.0134
CD274	11.2212	11.2212
SMAD3	11.6833	11.6833
HERC5	12.1313	12.1313
GMPR2	12.5914	12.5914
IFI35	13.1563	13.1563
MAP2	15.7246	15.7246
ADAR	15.7387	15.7387
TXNIP	16.0284	16.0284
RHOB	16.2241	16.2241
SLFN5	17.3162	17.3162
FNDC4	17.4791	17.4791
LGMN	17.8723	17.8723
TMEM62	18.5013	18.5013
TYMP	18.5838	18.5838
MX2	18.9627	18.9627
USP18	19.4485	19.4485
CDKN1A	19.5395	19.5395
SLFN12 (isoform 2)	20.2342	20.2342
MOV10	20.3218	20.3218
IGFBP3 (formerly 594)	20.7699	20.7699
ERLIN1	21.7259	21.7259
USP18	21.7439	21.7439
SLC16A4	23.4211	23.4211
TLR3	23.8782	23.8782
CD58	25.3759	25.3759
SAT1	25.5462	25.5462
PPM1K	25.6032	25.6032
SLC16A4	25.652	25.652
MYD88	25.9653	25.9653
IFNGR1	26.2741	26.2741
ENPP2 (formerly 597)	26.4058	26.4058
IFITM1(alias: IFI17)	26.4454	26.4454
GJA4	26.4873	26.4873
IRF2 ISOFORM 3	27.6461	27.6461
PMM2	27.8556	27.8556
APOBEC3A	28.426	28.426
PCGF5	28.4808	28.4808
PAK3	28.7728	28.7728
CD9	30.3	30.3
GBP1	30.9086	30.9086
C1orf38 (THEMIS2)	30.9549	30.9549
HLA-X	31.2994	31.2994
ADAR	32.0345	32.0345
CCL4	32.0867	32.0867
IRF7	32.1565	32.1565
DDX58	33.4705	33.4705
IFI6	33.4911	33.4911
TNFAIP6	33.6076	33.6076
ADAR	34.5732	34.5732
IFIT3 AKA CIG49	34.8951	34.8951
HLA-X	35.415	35.415
LAMP3	35.5071	35.5071
ZNF313 AKA RNF114	35.5574	35.5574
FNDC3B	36.4155	36.4155
JUNB	37.0554	37.0554
ARNTL	37.2255	37.2255
IRF2 aka PRIC285	38.1845	38.1845
RNF24	40.9341	40.9341
CA5B	41.6142	41.6142
FAM125B	42.0108	42.0108
LGALS9	44.3825	44.3825
FKBP5	45.4835	45.4835
IFI30	45.707	45.707
GBP1	46.6225	46.6225
NDC80	47.5342	47.5342
IFITM3 (formerly 36 IFITM2)	49.2391	49.2391
CD58	49.285	49.285
MLH3	49.5375	49.5375
OASL	49.6178	49.6178
APOBEC3F	49.8382	49.8382
RBM25	50.0476	50.0476
CLDN23	50.2504	50.2504
HLA-X	50.4589	50.4589
RASGEF1B	50.6023	50.6023
TRIM5-1	51.1239	51.1239
GCA	51.1425	51.1425
GLRX	51.1874	51.1874
HLA-X	51.7318	51.7318
LRAP/ERAP2	52.1215	52.1215
MASTL	52.404	52.404
ADM	53.1804	53.1804
ISG20	53.3087	53.3087
TLK2	53.4111	53.4111
CD69	53.642	53.642
TAGAP	53.8315	53.8315
PLA2G4C	54.0555	54.0555
C1S	54.3524	54.3524
BUB1	54.9911	54.9911
INDO (alias: IDO)	55.5736	55.5736
PRAP1	56.0317	56.0317
IFI16	56.1766	56.1766
TREX1	56.4867	56.4867
HIST1H2AC	56.7615	56.7615
CCL5(SYCA5)	57.4175	57.4175
APOL6	57.7039	57.7039
BST2/THN	58.2673	58.2673
TRIM38	58.4779	58.4779
ADAMDEC1	58.9323	58.9323
SERPINB9	58.9401	58.9401
RARRES3	59.0298	59.0298
PXK	59.2848	59.2848
UBE2L6	59.4903	59.4903
ABL2 isoform d	60.1444	60.1444
EMPTY-B1	60.1539	60.1539
CFB	60.4229	60.4229
BLVRA	60.4461	60.4461
ARHGEF3	60.8718	60.8718
PLSCR1	61.0997	61.0997
TDRD7/PCTAIRE2BP	62.3136	62.3136
NAPA	62.5241	62.5241
BLZF1	63.3553	63.3553
IL1RN	63.388	63.388
TLK2	63.8351	63.8351
TAP2	63.8573	63.8573
ANKFY1	64.896	64.896
APOL2	65.2043	65.2043
PLEKHA4	65.3054	65.3054
DDX60	65.5338	65.5338
MAX (isoform C)	65.6081	65.6081
FLRT3	66.9023	66.9023
DDX3X (alias: DDX3)	67.281	67.281
PTMA	67.4824	67.4824
RARRES3	68.0022	68.0022
PARP12	68.9368	68.9368
C6orf150	69.1368	69.1368
BTN3A3	69.6283	69.6283
TRIM34	69.6663	69.6663
IFI27	70.1105	70.1105
ADAMDEC1	70.2486	70.2486
ODC1	70.2652	70.2652
LIPA	70.3826	70.3826
CLEC4D	70.6017	70.6017
IFIH1 / MDA5	71.492	71.492
XAF1	71.9938	71.9938
APOBEC3B	72.2207	72.2207
CEACAM1	72.259	72.259
IFITM3	72.3094	72.3094
EMPTY-H12	73.0913	73.0913
APOBEC3B	73.6745	73.6745
GBP2	74.2773	74.2773
HLA-X	74.4908	74.4908
IFIT1 (alias: IFI56, ISG56)	74.6416	74.6416
IFI6	74.7672	74.7672
CNP	74.7981	74.7981
ZC3HAV1	74.9315	74.9315
NBN	76.5762	76.5762
OAS1	77.4441	77.4441
ELF1	77.5921	77.5921
MAFB	78.1377	78.1377
PPM1K	78.3086	78.3086
AIM2	78.5722	78.5722
LGALS3	78.6075	78.6075
EMPTY-D10	78.8039	78.8039
PI4K2B	79.409	79.409
ANKRD22	79.6866	79.6866
FAM46C	79.9856	79.9856
EPSTI1	80.0308	80.0308
BCL3	80.0503	80.0503
GCH1	80.1217	80.1217
NCF1	80.8316	80.8316
SPSB1	80.9256	80.9256
KCTD14	81.3074	81.3074
SLCO5A1	81.8708	81.8708
GPX2	82.3252	82.3252
DNAPTP6/SPATS2L	83.1055	83.1055
C17orf60	83.2768	83.2768
IFI44L	83.3273	83.3273
PLA2G4A	83.5156	83.5156
STARD5	83.6394	83.6394
PABPC4	83.6463	83.6463
FLJ23556	83.8378	83.8378
SAMD9L	83.9487	83.9487
PNPT1	84.2777	84.2777
SAMHD1	84.3022	84.3022
LDB1	84.3834	84.3834
PDGFRL	84.5627	84.5627
SQRDL	85.1184	85.1184
CTSS	85.2936	85.2936
B2M	85.4761	85.4761
LDB1	85.7362	85.7362
RTP4	86.5929	86.5929
CCNA1	87.5278	87.5278
C6orf150	87.5605	87.5605
LGALS3BP	87.7747	87.7747
IRF9	87.8089	87.8089
ENPP2 (Formerly 597)	88.2179	88.2179
PNRC1	88.4468	88.4468
GIMAP2	89.6645	89.6645
STAT1	90.4433	90.4433
SAMHD1	91.0226	91.0226
HERC6	91.3065	91.3065
FLJ23556	91.9132	91.9132
GJC1	92.7501	92.7501
C1orf38 (THEMIS2)	92.9832	92.9832
TMEM140	93.8704	93.8704
CCL2(alias: SCYA2, MCP1)	94.2448	94.2448
LY6E	94.628	94.628
ISG15	95.8639	95.8639
LY6E	96.8299	96.8299
EMPTY-H12	97.2559	97.2559
PCGF5	98.1691	98.1691
C4orf32	98.2299	98.2299
SLC16A1	98.2422	98.2422
CCDC75	98.5618	98.5618
ALDH1A1	98.6774	98.6774
BTN3A3	99.3574	99.3574
AXL	99.6705	99.6705
TRIM21	99.9716	99.9716
CASP7	100.05	100.05
C15orf48	100.252	100.252
PBEF1 aka NAMPT	100.854	100.854
XRN	101.458	101.458
CCL8	101.74	101.74
IFI35	103.089	103.089
SSBP3	103.159	103.159
TRIM5-4	103.446	103.446
LEPR	103.772	103.772
TRIM5-5	104.426	104.426
TCL6	104.635	104.635
SLC1A1	104.722	104.722
RAB27A	105.428	105.428
PRKD2	106.104	106.104
CCNA1	106.492	106.492
PNPT1	107.473	107.473
C9orf52	107.959	107.959
HSPA6	107.993	107.993
EMPTY-B1	108.068	108.068
CCND3	108.827	108.827
RXFP1	109.139	109.139
IFIT2	109.805	109.805
TLR1	110.307	110.307
GSDMDC1	110.413	110.413
NMI	110.439	110.439
VAMP5	111.112	111.112
ADAMDEC1	111.989	111.989
TNFSF18	111.998	111.998
IFI44	112.123	112.123
F3 (thromboplastin)	112.454	112.454
STAP1	112.637	112.637
PPM1K (formerly 329)	113.696	113.696
NRN1	114.171	114.171
PSMB10	114.62	114.62
CHMP5	114.896	114.896
GMPR2	114.996	114.996
OPTN	115.162	115.162
HESX1	115.912	115.912
ISG20	116.047	116.047
C22orf28	116.286	116.286
ARTS-1	116.307	116.307
TRIMCYP	116.732	116.732
MX1	116.855	116.855
TREX1	116.988	116.988
OAS2	117.097	117.097
GTPBP2	117.49	117.49
HORMAD2	117.51	117.51
XAF1	117.97	117.97
CKB	118.268	118.268
STARD5	118.41	118.41
GBP3	119.217	119.217
AIM2	119.335	119.335
C4orf33	120.025	120.025
CLDN23	120.222	120.222
BRDG1	120.482	120.482
DCP1A isoform 4	122.31	122.31
IL4I1	122.361	122.361
DHX58	123.584	123.584
IL15RA	125.009	125.009
XAF1	125.469	125.469
WARS	125.786	125.786
CXCL10 alias SCYB10	125.79	125.79
CXCL11	125.897	125.897
TNFSF13B	126.082	126.082
ARG2	126.485	126.485
PHF15	127.192	127.192
TRIM5-2	127.867	127.867
ANGPTL1	128.46	128.46
PSME1	129.098	129.098
DEFB1	129.157	129.157
USP18	129.841	129.841
BTN3A2	130.531	130.531
ETV7	131.036	131.036
VIPERIN/RSAD2	131.273	131.273
GK	131.771	131.771
PRKD2	132.067	132.067
DYNLT1 (Tctex-type 1)	132.286	132.286
TIMP1	132.704	132.704
FBXO6	133.54	133.54
IL18BP	133.881	133.881
NFIL3	134.101	134.101
ABLIM3	134.119	134.119
EMPTY-B1	134.372	134.372
HIST1H2BB	135.274	135.274
EMPTY-B1	135.305	135.305
IFIT1 (alias: IFI56, ISG56)	135.338	135.338
ACSL5	135.617	135.617
OGFR	136.215	136.215
NRN1	137.167	137.167
TAGAP	138.991	138.991
PRAP1	139.036	139.036
TMEM51	140.333	140.333
PRAP1	140.354	140.354
C3AR1	140.394	140.394
LYRM2	141.501	141.501
ENPP2 (formerly 597	141.562	141.562
PXK	141.919	141.919
LGALS3BP	142.536	142.536
STAT3	143.409	143.409
MOV10	144.449	144.449
SCO2	144.528	144.528
ZSCAN12	145.599	145.599
TLR7	146.511	146.511
IFI44L	146.748	146.748
ACSL5	147.745	147.745
MKX	149.942	149.942
TMEM49	150.022	150.022
TNFSF13B	150.709	150.709
JAK2	152.884	152.884
SLC2A12	154.105	154.105
CPT1A	156.318	156.318
HK2	156.322	156.322
PSMB8	156.706	156.706
PXK	156.781	156.781
TRIM22	156.898	156.898
LGALS3BP	157.47	157.47
PABPC4	158.743	158.743
MT1E (Not MT1X/MT1L)	159.171	159.171
SAMD9	159.898	159.898
USP18	160.317	160.317
IFI16	161.97	161.97
AXUD1 isoform 2	162.005	162.005
CYP1B1	162.879	162.879
APOBEC3F	163.188	163.188
ZNF385B	163.46	163.46
BUB1	164.141	164.141
USP18	165.314	165.314
SAMD4A	166.954	166.954
SERPING1 (alias: C1NH)	169.663	169.663
MT1E (Formerly 299)	173.539	173.539
Hist	174.489	174.489
UNC93B1 isofom3	174.66	174.66
ADFP	176.163	176.163
EMPTY-B1	176.183	176.183
IFITM3	176.266	176.266
C14orf83	176.937	176.937
TAPBPL	177.651	177.651
BTN3A2	178.691	178.691
CMAH	179.212	179.212
SLC25A30	181.41	181.41
SCO2 (fragment)	184.809	184.809
SPP1 (formerly 593)	185.151	185.151
PLSCR2	185.57	185.57
HLA-X	188.455	188.455
PSMB9	188.53	188.53
PCTK2	189.637	189.637
IL15	189.754	189.754
AXL	192.246	192.246
CD74	192.454	192.454
ZNF385B	192.576	192.576
HIST1H3D	193.016	193.016
TNFSF10	194.04	194.04
STAT2	197.245	197.245
FAM46A	197.46	197.46
EMPTY-H12	197.499	197.499
GUCA1C	197.817	197.817
MAB21L2	199.244	199.244
HIST2H2AA4	199.631	199.631
PFKFB3	200.601	200.601
ATF3	201.819	201.819
CLDN23	203.263	203.263
CCL19	204.468	204.468
TSLP	204.471	204.471
TNFSF10	206.962	206.962
c5orf56	217.45	217.45
LMO2	217.869	217.869
SOCS2	219.498	219.498
LAP3	227.985	227.985
DTX3L	231.595	231.595
TAGAP	232.544	232.544
ACSL5	234.319	234.319
APOBEC3G	238.706	238.706
ETV6	239.649	239.649
MT1E (Formerly 299)	240.772	240.772
NT5C3	251.885	251.885
PMAIP1	285.252	285.252
CA5B	289.244	289.244
B3GALNT1	290.578	290.578
PANX1	294.048	294.048
CLEC2B	310.751	310.751
RPL22	318.349	318.349
EMPTY-H12	334.344	334.344
NPBWR1	337.211	337.211
HIST2H2AA3	341.737	341.737
IFIT5	343.68	343.68
ZNF295 isoform 6	358.372	358.372
RGL1	368.658	368.658
LIPC	419.975	419.975
MOBKL2C	451.543	451.543
TRIM5-3	496.942	496.942
PSCD1 AKA CYTH1	525.714	525.714
HPSE	701.3	701.3
HPSE	1281.03	1281.03
WATER	0
WATER	0.0001
WATER	0.0001
WATER	0.0001
WATER	0.0001

## Sheet: Sheet1
ISG name	Species	Secondary screen RLU	Transduction RFP	Electroporation RLU	Electroporation RNA	HCVcc RNA	Comments
RNASE4/L	HS	Y	Y	Y	Y	N	no HCVcc activity
DDX58/RIG-I	HS	Y	Y	stopped			known
IRF1	HS	Y	Y	Y	Y	Y	known control
APOBEC3G	HS	Y	N	stopped			poor transduction
TRIM56	HS	Y	N	stopped			poor transduction
SAMD9L	HS	Y	N	stopped			poor transduction
DDX60	HS	Y	Y	stopped			known
ARHGAP17	HS	Y	Y	Y	Y	N	enhanced HCVcc
NOS2A	HS	Y	N	stopped			poor transduction
OASL	HS	Y	Y	stopped			known
ARHGEF3	HS	Y	Y	Y	Y	Y	Inhibited HCV in all systems
ADAR	HS	Y	Y	stopped			known
PARP10	HS	Y	N	stopped			poor transduction
CDKN1A	HS	Y	Y	Y	N	stopped	ratio of WT:GND LUC failed
SRBII	HS	Y	Y	Y	Y	N	no HCVcc activity
FAM46C	HS	Y	Y	Y	Y	N	modest HCVcc activity
TRIM34	HS	Y	Y	Y	Y	N	modest HCVcc activity
SLC15A3	HS	Y	Y	Y	Y	N	modest HCVcc activity
NCOA7	MM	Y	Y	N	stopped		no activity against electroporated RNA
MLKL	MM	Y	N	stopped			poor transduction
C5ORF39	MM	Y	N	stopped			control
RNASE4/L	MM	Y	Y	Y	stopped		known
IFNB1	MM	Y	Y	stopped			known
COMMD3	MM	Y	Y	Y	Y	N	minor HCVcc activity
SRBII	MM	Y	Y	N	stopped		no activity against electroporated RNA
IRF1	MM	Y	Y	Y	Y	stopped	control
CASP1	MM	Y	Y	Y	Y	N	no HCVcc activity
BST2/TETHERIN	MM	Y	N	stopped			known
DDX60L	MM	Y	Y	stopped			known
PKR/EIF2AK2	MM	Y	N	stopped			known
PHF11	MM	Y	Y	Y	Y	N	minor HCVcc activity
XRN	MM	Y	Y	stopped			known
PTAR1	MM	Y	Y	Y	N	stopped	no effect on SGR RNA
BTN3A1	MM	Y	Y	Y	Y	N	minor HCVcc activity
